# Supplementary material for: Inclusion of a well resolved T4(2)6(2) water tape in a H-bonded, (4,7)-binodal 3D network
Source: Royal Society of Chemistry journal article supplement (doi:10.1039/b811376a), 2008-10-30
Supplement: b811376a.pdf [file b811376a.pdf]

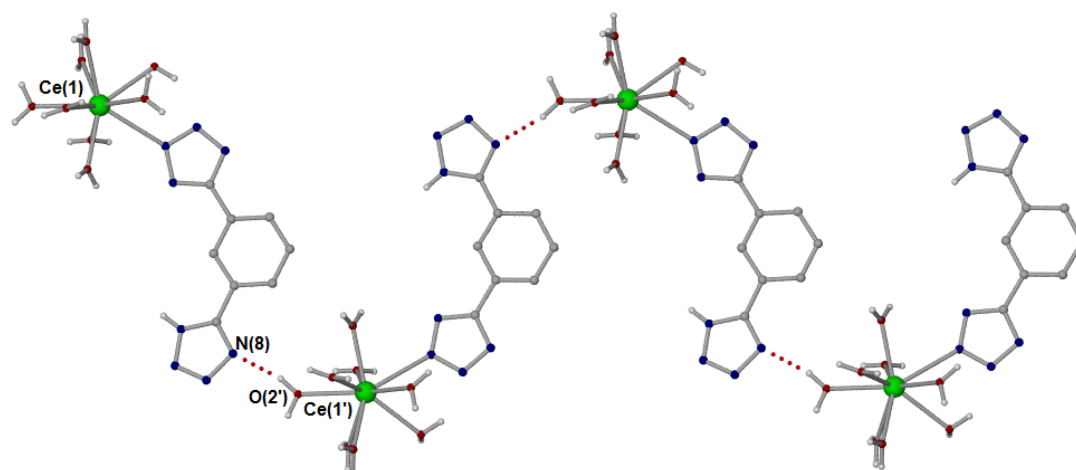

**Figure S1** The 1D H-bonded  $[\text{Ce}(\text{H}_2\text{O})_8(m\text{-BDTH})]^{2+}$  cationic chain parallel to  $a0c$  plane. Lattice water molecules are omitted for clarity (symmetry operation  $-1/2 + x, 1/2 - y, z - 1/2$ )

**Table S1** Parameters for hydrogen bonding in **1**.

|                   |         |         |           |                     |
|-------------------|---------|---------|-----------|---------------------|
| N5-H5 ... O12     | 0.85(5) | 1.86(5) | 2.673(5)  | 162(4)              |
| O1-H11 ... O13    | 0.87(4) | 1.99(5) | 2.716(5)  | 140(5)              |
| O1-H12 ... N14    | 0.83(5) | 2.02(5) | 2.847(5)  | 174(6) <sup>b</sup> |
| O2-H21 ... N8     | 0.84(5) | 2.00(6) | 2.819(5)  | 165(5) <sup>d</sup> |
| O2-H22 ... O20    | 0.86(4) | 1.96(4) | 2.811(5)  | 177(7) <sup>a</sup> |
| O3-H31 ... O14    | 0.84(4) | 1.92(4) | 2.748(5)  | 168(5)              |
| O3-H32 ... O11    | 0.84(4) | 1.89(5) | 2.721(5)  | 176(6)              |
| O4-H41 ... N9     | 0.84(5) | 1.99(5) | 2.825(5)  | 170(5) <sup>e</sup> |
| O4-H42 ... O6     | 0.85(4) | 1.92(4) | 2.770(4)  | 176(6) <sup>a</sup> |
| O5-H51 ... N10    | 0.87(4) | 2.23(5) | 3.072(5)  | 162(5) <sup>f</sup> |
| O5-H52 ... O22A   | 0.87(3) | 1.96(4) | 2.796(9)  | 162(5)              |
| O5-H52 ... O22B   | 0.87(3) | 2.16(3) | 3.022(8)  | 170(5)              |
| O6-H61 ... O16    | 0.87(5) | 1.88(5) | 2.747(5)  | 175(4)              |
| O6-H62 ... N2     | 0.86(5) | 1.96(5) | 2.710(5)  | 145(4)              |
| O7-H71 ... O20    | 0.87(5) | 1.95(5) | 2.821(5)  | 174(5) <sup>g</sup> |
| O7-H72 ... N10    | 0.86(4) | 2.04(4) | 2.888(5)  | 170(4) <sup>f</sup> |
| O8-H81 ... O17    | 0.83(4) | 1.92(3) | 2.736(5)  | 169(5)              |
| O8-H82 ... N11    | 0.86(5) | 2.08(5) | 2.927(6)  | 174(6) <sup>d</sup> |
| O11-H111 ... N4   | 0.85(5) | 1.87(5) | 2.702(5)  | 171(4)              |
| O11-H112 ... O15  | 0.83(4) | 1.95(4) | 2.751(5)  | 164(5) <sup>g</sup> |
| O12-H121 ... O19  | 0.83(5) | 1.89(5) | 2.724(5)  | 177(7) <sup>d</sup> |
| O12-H122 ... O11  | 0.85(4) | 1.83(4) | 2.673(4)  | 171(6)              |
| O13-H132 ... O22A | 0.85(5) | 2.41(6) | 2.854(10) | 113(5)              |
| O14-H142 ... N13  | 0.84(5) | 1.90(5) | 2.731(5)  | 173(4) <sup>b</sup> |
| O15-H151 ... N12  | 0.85(5) | 1.91(5) | 2.743(5)  | 168(5) <sup>d</sup> |
| O16-H161 ... O17  | 0.86(5) | 1.91(4) | 2.741(5)  | 161(6)              |
| O17-H171 ... O19  | 0.85(5) | 1.97(5) | 2.799(5)  | 165(5) <sup>g</sup> |
| O17-H172 ... N16  | 0.85(6) | 1.94(6) | 2.785(5)  | 173(4)              |

|                   |         |         |           |                     |
|-------------------|---------|---------|-----------|---------------------|
| O18-H181 ... N15  | 0.87(5) | 1.93(5) | 2.794(5)  | 171(6) <sup>b</sup> |
| O19-H191 ... O15  | 0.85(5) | 1.88(5) | 2.728(5)  | 174(5)              |
| O19-H192 ... O21  | 0.86(5) | 1.88(6) | 2.732(5)  | 170(6)              |
| O20-H201 ... O18  | 0.87(3) | 1.85(4) | 2.707(6)  | 168(4) <sup>a</sup> |
| O20-H202 ... O21  | 0.86(5) | 2.31(5) | 3.038(5)  | 143(5)              |
| O21-H211 ... N1   | 0.85(6) | 2.01(6) | 2.843(5)  | 166(6)              |
| O21-H212 ... O22B | 0.82(5) | 2.10(6) | 2.774(10) | 139(5) <sup>a</sup> |

Symmetry operation

<sup>a</sup> 1-x,1-y,1-z

<sup>b</sup> x,y,1+z

<sup>d</sup> -1/2+x,1/2-y,1/2+z

<sup>e</sup> 1/2+x,1/2-y,1/2+z

<sup>f</sup> 1/2-x,1/2+y,1/2-z

<sup>g</sup> -1+x,y,z

**Table S2** Parameters for hydrogen bonding in **2**.

|                   |         |         |           |                     |
|-------------------|---------|---------|-----------|---------------------|
| N5-H5 ... O12     | 0.84(5) | 1.85(5) | 2.668(5)  | 166(4)              |
| O1-H11 ... O13    | 0.86(4) | 1.87(5) | 2.719(5)  | 169(5) <sup>a</sup> |
| O1-H12 ... N14    | 0.86(5) | 1.99(5) | 2.845(5)  | 176(6) <sup>b</sup> |
| O2-H21 ... N8     | 0.83(5) | 2.00(6) | 2.816(5)  | 167(5) <sup>c</sup> |
| O2-H22 ... O20    | 0.86(4) | 1.95(4) | 2.810(5)  | 178(7) <sup>d</sup> |
| O3-H31 ... O14    | 0.86(4) | 1.91(4) | 2.758(5)  | 174(5) <sup>c</sup> |
| O3-H32 ... O11    | 0.80(4) | 1.93(5) | 2.725(5)  | 174(6)              |
| O4-H41 ... N9     | 0.86(5) | 1.99(5) | 2.833(5)  | 169(5) <sup>a</sup> |
| O4-H42 ... O6     | 0.87(4) | 1.90(4) | 2.776(4)  | 175(6) <sup>e</sup> |
| O5-H51 ... N10    | 0.84(4) | 2.29(5) | 3.071(5)  | 155(5) <sup>f</sup> |
| O5-H52 ... O22A   | 0.85(3) | 1.96(4) | 2.795(9)  | 166(5) <sup>g</sup> |
| O5-H52 ... O22B   | 0.85(3) | 2.18(3) | 3.021(8)  | 169(5) <sup>g</sup> |
| O6-H61 ... O16    | 0.84(5) | 1.91(5) | 2.743(5)  | 171(4) <sup>h</sup> |
| O6-H62 ... N2     | 0.84(5) | 1.94(5) | 2.704(5)  | 151(4)              |
| O7-H71 ... O20    | 0.84(5) | 1.95(5) | 2.820(5)  | 173(5) <sup>h</sup> |
| O7-H72 ... N10    | 0.84(4) | 2.06(4) | 2.892(5)  | 172(4) <sup>f</sup> |
| O8-H81 ... O17    | 0.85(4) | 1.89(3) | 2.735(5)  | 174(5) <sup>h</sup> |
| O8-H82 ... N11    | 0.87(5) | 2.10(5) | 2.944(6)  | 165(6) <sup>c</sup> |
| O11-H111 ... N4   | 0.87(5) | 1.88(5) | 2.710(5)  | 176(4)              |
| O11-H112 ... O15  | 0.83(4) | 1.93(4) | 2.748(5)  | 167(5) <sup>h</sup> |
| O12-H121 ... O19  | 0.83(5) | 1.90(5) | 2.723(5)  | 173(7)              |
| O12-H122 ... O11  | 0.85(4) | 1.84(4) | 2.676(4)  | 171(6)              |
| O13-H131 ... N6   | 0.89(5) | 2.04(6) | 2.921(10) | 173(5)              |
| O13-H132 ... O18  | 0.84(5) | 2.15(6) | 2.927(10) | 153(5) <sup>i</sup> |
| O13-H132 ... O22A | 0.84(5) | 2.32(6) | 2.841(10) | 121(5) <sup>i</sup> |
| O14-H141 ... O12  | 0.79(5) | 2.10(5) | 2.861(5)  | 160(4) <sup>j</sup> |
| O14-H142 ... N13  | 0.83(5) | 1.91(5) | 2.730(5)  | 175(4) <sup>a</sup> |
| O15-H151 ... N12  | 0.83(5) | 1.93(5) | 2.741(5)  | 168(5) <sup>b</sup> |
| O15-H152 ... O14  | 0.84(5) | 1.96(5) | 2.776(5)  | 166(5) <sup>c</sup> |

|                   |         |         |           |                     |
|-------------------|---------|---------|-----------|---------------------|
| O16-H161 ... O17  | 0.87(5) | 1.88(4) | 2.742(5)  | 168(6)              |
| O16-H162 ... N7   | 0.84(5) | 2.11(4) | 2.8917(5) | 154(6) <sup>i</sup> |
| O17-H171 ... O19  | 0.83(5) | 2.01(5) | 2.801(5)  | 158(5)              |
| O17-H172 ... N16  | 0.85(6) | 1.95(6) | 2.789(5)  | 168(4) <sup>a</sup> |
| O18-H181 ... N15  | 0.87(5) | 1.95(5) | 2.814(5)  | 166(6) <sup>a</sup> |
| O19-H191 ... O15  | 0.87(5) | 1.87(5) | 2.729(5)  | 173(5)              |
| O19-H192 ... O21  | 0.85(5) | 1.90(6) | 2.738(5)  | 169(6)              |
| O20-H201 ... O18  | 0.86(3) | 1.87(4) | 2.709(6)  | 165(4) <sup>i</sup> |
| O21-H212 ... O13  | 0.85(6) | 2.38(6) | 3.060(5)  | 138(6)              |
| O21-H212 ... O22B | 0.85(5) | 2.30(6) | 2.787(5)  | 117(5) <sup>k</sup> |

Symmetry operation

$$^a = 1/2+x, 1/2-y, 1/2+z$$

$$^b = x, y, 1+z$$

$$^c = -1/2+x, 1/2-y, 1/2+z$$

$$^d = 1/2-x, 1/2+y, 3/2-z$$

$$^e = 1-x, 1-y, 1-z$$

$$^f = 1/2-x, 1/2+y, 1/2-z$$

$$^g = 3/2-x, 1/2+y, 3/2-z$$

$$^h = -1/2+x, 1/2-y, -1/2+z$$

$$^k = -1+x, y, z$$

$$^i = 1-x, -y, 1-z$$

$$^j = 1+x, y, z$$

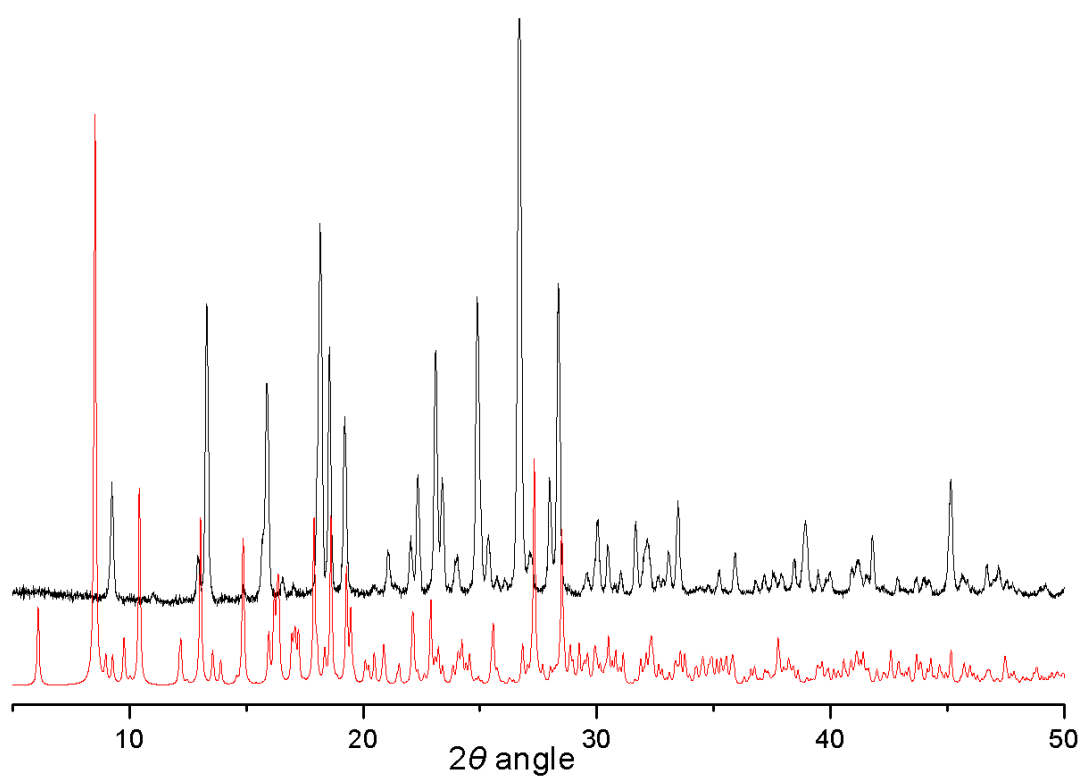

**Fig. S2** X-ray powder pattern for the product formed hydrothermally (black) with the calculated pattern (red) for **1** for comparison.
